# Supplementary material for: Estradiol Inhibits Human Brain Vascular Pericyte Migration Activity: A Functional and Transcriptomic Analysis
Source: MDPI journal article supplement (doi:10.3390/cells10092314), 2021-09-04
Supplement: s1 [file s1]

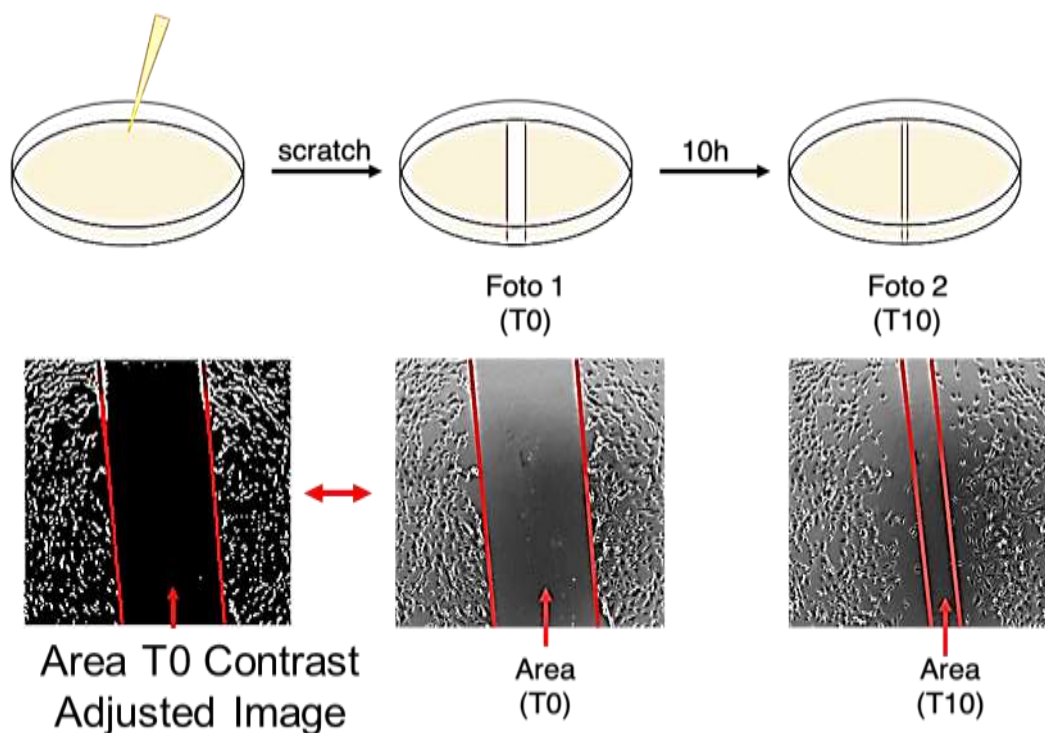

**Figure S1.** Schematic representation of experimental set-up for the scratch/wound-closure assay. Confluent monolayers were mechanically scratched with a yellow pipette tip (10  $\mu$ l–200  $\mu$ l) before treatment was applied. Images of each scratch were taken right after the scratch was made (T0) and 10h thereafter (T10) with an automated Olympus IX81 microscope (Olympus, Volketswil, CH). Area of wound closure was determined by using the software ImageJ, and relative wound closure was calculated as follows:  $\text{Area(T0)} - \text{Area(T10)} / \text{Area(T0)}$ . Representative images are depicted.

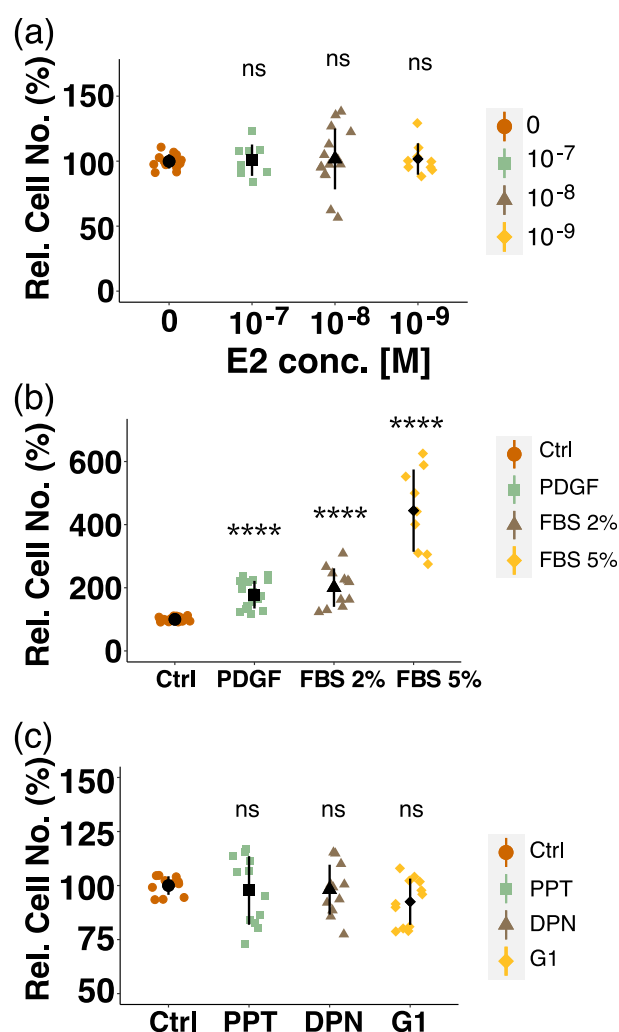

**Figure S2.** Estradiol (E2) has no impact on pericyte (PC) proliferation / platelet-derived growth factor (PDGF)-BB and fetal bovine serum (FBS) increase PC proliferation / ER-agonists have no effect on PC proliferation. PCs were treated with E2 at different concentrations ( $10^{-7}$ ,  $10^{-8}$  or  $10^{-9}$  M) or vehicle (a) or with PDGF-BB (20 ng/ml) or FBS (2% and 5%) or vehicle (Ctrl) (b) or with the ER-agonists PPT (ER- $\alpha$ -agonist), DPN (ER- $\beta$ -agonist), G-1 (GPER-agonist) ( $10^{-7}$  M each) or vehicle (c). Cell number was assessed after 3 days of treatment by cell counting. Experiments were performed at least 3 times in triplicates and data represent mean  $\pm$  sd. ns  $p > 0.05$ , \*\*\*\*  $p < 0.0001$  compared to Ctrl. “Conc.” = Concentration; “Rel. Cell No.” = Relative cell number.

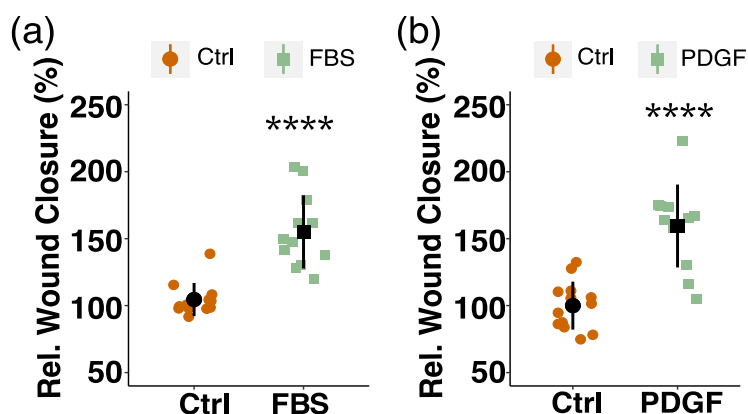

**Figure S3.** FBS and PDGF-BB induce migration in pericytes (PCs). PCs were grown to confluence and treated with either FBS, 2% (a), PDGF-BB, 20 ng/ml (b) or vehicle (Ctrl) after a scratch was induced. Migration was assessed after 10h. Experiments were performed 3 times in triplicates and data represent mean  $\pm$  sd. \*\*\*\*  $p < 0.0001$ , compared to Ctrl. “Rel”: Relative.

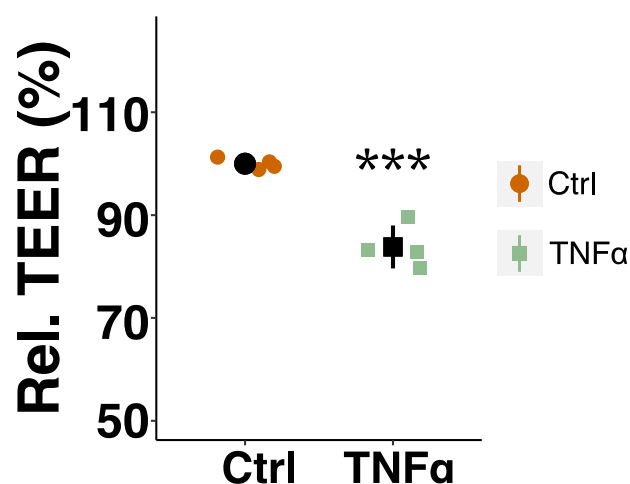

**Figure S4.** TNFα reduces barrier function of an endothelial monolayer in vitro. Human cerebral microvascular endothelial cells (hCMEC/D3) were cultured on transwell filters. Once a stable barrier was established after 5 days in culture, cells were treated with TNFα (10 ng/ml) or vehicle (Ctrl) and barrier function was assessed after 24h of treatment by measuring trans-endothelial electric resistance with a cellZscope instrument. Experiment was performed two times in duplicates and data represent mean  $\pm$  sd. \*\*\*  $p < 0.001$ , compared to Ctrl. "Rel.": Relative.

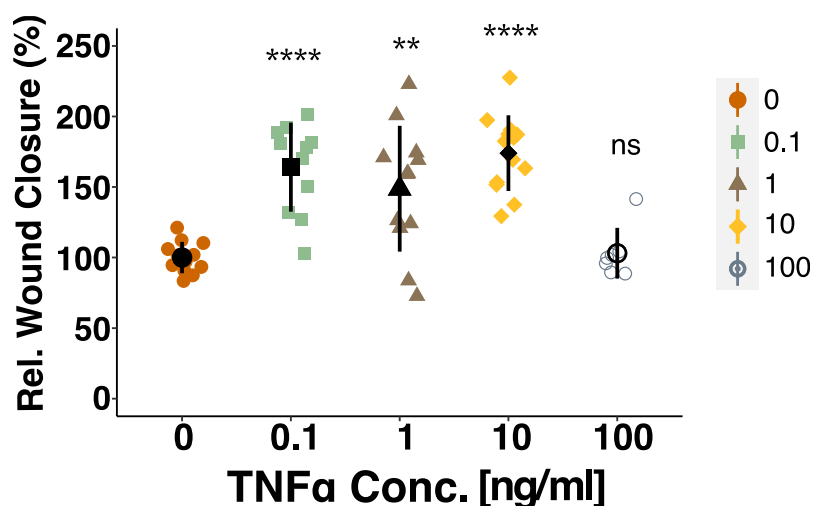

**Figure S5.** TNFα increases pericyte (PC) migration. Confluent PCs were scratched and treated with different concentrations of TNFα (0.1, 1, 10 and 100 ng/ml) or vehicle (0). The degree of wound closure was assessed after 10h. Experiments were performed 3 times in triplicates or quadruplicates and data represent mean  $\pm$  sd. ns  $p > 0.05$ , \*\*  $p < 0.01$ , \*\*\*\*  $p < 0.0001$ , compared to control (0). "Rel.": Relative.

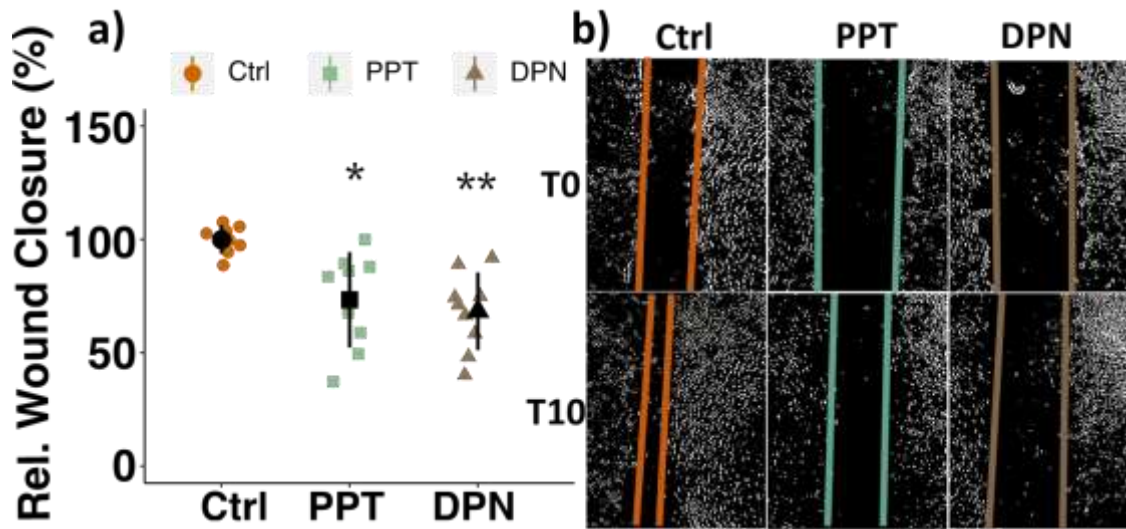

**Figure S6.** Estrogen receptors ER- $\alpha$  and ER- $\beta$  are responsible for estrogen-mediated downregulation of pericyte migration. PCs were treated with agonists for ER- $\alpha$  (PPT) or ER- $\beta$  (DPN) ( $10^{-7}$  M) or vehicle after a scratch wound was induced (a). Relative wound closure was assessed after 10h and representative images are shown on the right side of the graph for T0 and T10 (b). Experiments were performed 3 times in triplicates and data represent mean  $\pm$  sd. \*  $p < 0.05$ , \*\*  $p < 0.01$ , compared to Ctrl. "Rel.": Relative.

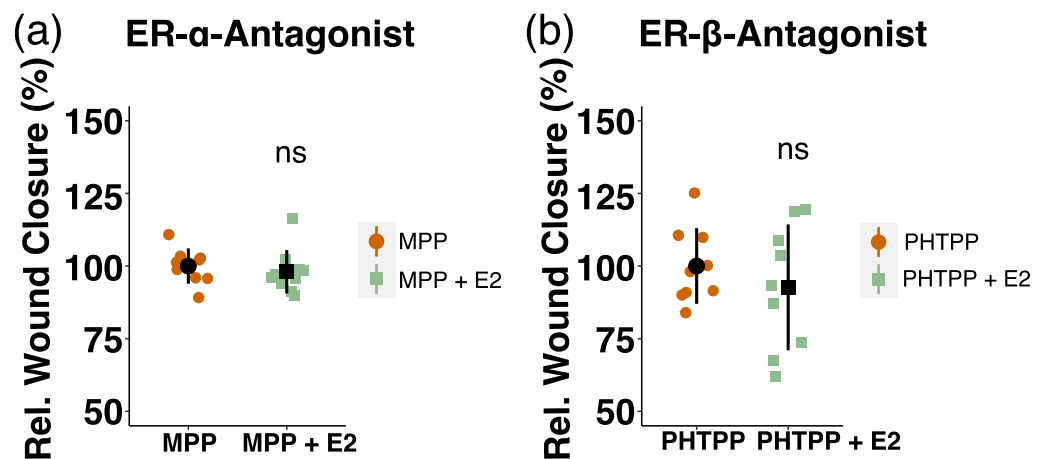

**Figure S7.** ER- $\alpha$ - and ER- $\beta$ -antagonists block the effect of estradiol (E2) on pericyte (PC) migration. PCs were grown to confluency and pretreated with either one of the ER-antagonists MPP (ER- $\alpha$ -antagonist) (a) or PHTPP (ER- $\beta$ -antagonist) (b) ( $5 \times 10^{-7}$  M each) for 30 minutes. Thereafter, a scratch was induced and E2 treatment ( $10^{-8}$  M) or vehicle was applied in presence of the respective antagonist. The degree of migration was assessed after 10h. Experiments were performed three times in triplicates and data represents mean  $\pm$  sd. ns  $p > 0.05$ . "Rel.": Relative.

**Table S1.** Top ten downregulated genes in estradiol treated pericytes.

| Gene           | Gene Description                                      | Log2 FC<br>(Co- Vs. Mono-Culture) | FDR $p$ -Value |
|----------------|-------------------------------------------------------|-----------------------------------|----------------|
| FADS1; MIR1908 | Fatty acid desaturase 1;<br>microRNA 1908             | -3.1                              | 0.208          |
| ZFYVE16        | Zinc finger, FYVE domain containing 16                | -3.1                              | 0.058          |
| ZNF791         | Zinc finger protein 791                               | -2.8                              | 0.315          |
| SIX4           | SIX homeobox 4                                        | -2.8                              | 0.333          |
| RBBP9          | Retinoblastoma binding protein 9                      | -2.5                              | 0.315          |
| CYP1B1         | Cytochrome P450, family 1, subfamily B, polypeptide 1 | -2.4                              | 0.315          |
| CPSF2          | Cleavage and polyadenylation specific factor 2        | -2.3                              | 0.208          |

|         |                                                         |      |       |
|---------|---------------------------------------------------------|------|-------|
| RAB33B  | RAB33B, member RAS oncogene family                      | -2.3 | 0.208 |
| CR2     | Complement component (3d/Epstein Barr virus) receptor 2 | -2.3 | 0.305 |
| ZDHHC20 | Zinc finger, DHHC-type containing 20                    | -2.2 | 0.249 |

PCs were cultured on transwell inserts and treated with estradiol (10 nM) or dmsol for 48h. Fold changes (FC) and adjusted *p*-values (FDR *p*-val) are depicted in the third and fourth column, respectively. Transcriptome Analysis Console (TAC, Applied Biosystems) was used for analyzing gene expression data of E2 treated vs. dmsol treated PCs in triplicates. For the analysis, a fold change (FC) cut-off of +/- 2 and FDR *p*-Value of 0.34 was applied.

**Table S2.** Upregulated genes in estradiol treated pericytes.

| Gene       | Gene Description                                             | Log2 FC<br>(Co- Vs. Mono-Culture) | FDR <i>p</i> -Value |
|------------|--------------------------------------------------------------|-----------------------------------|---------------------|
| REXO4      | REX4 homolog, 3'-5' exonuclease                              | 2.8                               | 0.249               |
| NDUFAF6    | NADH dehydrogenase (ubiquinone) complex I, assembly factor 6 | 2.4                               | 0.249               |
| C12orf45   | Chromosome 12 open reading frame 45                          | 2.4                               | 0.249               |
| VEGFC      | Vascular endothelial growth factor C                         | 2.3                               | 0.249               |
| ZNF582-AS1 | ZNF582 antisense RNA 1 (head to head)                        | 2.2                               | 0.315               |
| NPR2       | Natriuretic peptide receptor 2                               | 2.2                               | 0.208               |
| DACT1      | Dishevelled Binding Antagonist Of Beta Catenin 1             | 2.1                               | 0.332               |
| SBSN       | Suprabasin                                                   | 2.1                               | 0.249               |
| GLIPR1N1   | GLI pathogenesis-related 1 like 1                            | 2.1                               | 0.315               |

PCs were cultured on transwell inserts and treated with estradiol (10 nM) or dmsol for 48h. Fold changes (FC) and adjusted *p*-values (FDR *p*-val) are depicted in the third and fourth column, respectively. Transcriptome Analysis Console (TAC, Applied Biosystems) was used for analyzing gene expression data of E2 treated vs. dmsol treated PCs in triplicates. For the analysis, a fold change (FC) cut-off of +/- 2 and FDR *p*-Value of 0.34 was applied.

**Table S3.** Differentially regulated genes (DRGs) in estradiol treated endothelial cells.

| Gene   | Gene Description                                  | Log2 FC<br>(Co- Vs. Mono-Culture) | FDR <i>p</i> -Value |
|--------|---------------------------------------------------|-----------------------------------|---------------------|
| DLK1   | Delta-like 1 homolog (Drosophila)                 | 2.4                               | 0.312               |
| CYTH4  | Cytohesin 4                                       | 2.3                               | 0.171               |
| PMAIP1 | Phorbol-12-myristate-13-acetate-induced protein 1 | -2.1                              | 0.312               |
| ING1   | Inhibitor of growth family member 1               | -2.1                              | 0.321               |

ECs were cultured on transwell inserts before they were treated with estradiol (10 nM) or dmsol for 48h. Fold changes (FC) and adjusted *p*-values (FDR *p*-val) are depicted in the third and fourth column, respectively. Transcriptome Analysis Console (TAC, Applied Biosystems) was used for analyzing gene expression data of E2 treated vs. dmsol treated ECs in triplicates.. For the analysis, a fold change (FC) cut-off of +/- 2 and FDR *p*-Value of 0.34 was applied.

**Table S4.** Differentially regulated gene (DRG) in endothelial cells (ECs) co-cultured with pericytes (PCs) and treated with estradiol.

| Gene  | Gene Description                          | Log2 FC<br>(Co- Vs. Mono-Culture) | FDR <i>p</i> -Value |
|-------|-------------------------------------------|-----------------------------------|---------------------|
| ABCC3 | ATP binding cassette subfamily C member 3 | 2.0                               | 0.110               |

ECs were co-cultured with PCs on the opposite sides of transwell inserts and treated with estradiol (10 nM) or dmsol for 48h. Fold changes (FC) and adjusted *p*-values (FDR *p*-val) are depicted in the third and fourth column, respectively. Transcriptome Analysis Console (TAC, Applied Biosystems) was used for analyzing gene expression data of E2 treated vs. dmsol treated ECs in triplicates. For the analysis, a fold change (FC) cut-off of +/- 2 and FDR *p*-Value of 0.34 was applied.

**Table S5.** Downregulated genes in estradiol treated pericytes co-cultured with endothelial cells on the opposite side of a transwell insert.

| Gene     | Gene Description       | Log2 FC<br>(Co- Vs. Mono-Culture) | FDR <i>p</i> -Value |
|----------|------------------------|-----------------------------------|---------------------|
| HIST1H3I | Histone cluster 1, H3i | -3.3                              | 0.335               |
| HIST1H4D | Histone cluster 1, H4d | -2.0                              | 0.335               |

PCs were co-cultured with ECs on the opposite sides of transwell inserts and treated with estradiol (10 nM) or dmsol for 48h. Fold changes (FC) and adjusted *p*-values (FDR *p*-val) are depicted in the third and fourth column, respectively. Transcriptome Analysis Console (TAC, Applied Biosystems) was used for analyzing gene expression data of E2 treated vs. dmsol treated PCs in triplicates. For the analysis, a fold change (FC) cut-off of +/- 2 and FDR *p*-Value of 0.34 was applied.

**Table S6.** Top ten upregulated genes in estradiol treated pericytes co-cultured with endothelial cells on the opposite side of a transwell insert.

| Gene    | Gene Description                                                  | Log2 FC<br>(Co- Vs. Mono-Culture) | FDR <i>p</i> -Value |
|---------|-------------------------------------------------------------------|-----------------------------------|---------------------|
| ENPP4   | Ectonucleotide pyrophosphatase/ phosphodiesterase 4<br>(putative) | 2.7                               | 0.335               |
| TARSL2  | Threonyl-tRNA synthetase-like 2                                   | 2.7                               | 0.335               |
| TIFA    | TRAF-interacting protein with forkhead-associated<br>domain       | 2.5                               | 0.335               |
| ALG6    | Alpha-1,3-glucosyltransferase                                     | 2.4                               | 0.335               |
| MYO9A   | Unconventional myosin-IXa                                         | 2.4                               | 0.335               |
| BEND6   | BEN domain containing 6                                           | 2.3                               | 0.335               |
| CCDC112 | Coiled-coil domain containing 112                                 | 2.3                               | 0.335               |
| CENPE   | Centromere protein E                                              | 2.3                               | 0.335               |
| ZNHIT6  | Zinc finger, HIT-type containing 6                                | 2.2                               | 0.335               |
| PAK1IP1 | PAK1 interacting protein 1                                        | 2.2                               | 0.335               |

PCs were co-cultured with endothelial cells on the opposite sides of transwell inserts and treated with estradiol (10 nM) or DMSO for 48h. Fold changes (FC) and adjusted *p*-values (FDR *p*-val) are depicted in the third and fourth column, respectively. Transcriptome Analysis Console (TAC, Applied Biosystems) was used for analyzing gene expression data of E2 treated vs. dmsol treated PCs in triplicates. For the analysis, a fold change (FC) cut-off of +/- 2 and FDR *p*-Value of 0.34 was applied.
